# Supplementary material for: Continuous measurements at the urban roadside in an Asian megacity by Aerosol Chemical Speciation Monitor (ACSM): particulate matter characteristics during fall and winter seasons in Hong Kong
Source: Copernicus journal article supplement (doi:10.5194/acp-16-1713-2016), 2016-02-15
Supplement: Supplementary file 1 [file acp-16-1713-2016-supplement.zip]

Archive with 2 entries (2 files):
- supplementMK_20160124_Grace_revised.docx
- acp-16-1713-2016-supplement-title-page.pdf
