# Supplementary material for: Continuous measurements at the urban roadside in an Asian megacity by Aerosol Chemical Speciation Monitor (ACSM): particulate matter characteristics during fall and winter seasons in Hong Kong
Source: Copernicus journal article supplement (doi:10.5194/acp-16-1713-2016), 2016-02-15
Supplement: Supplementary file 1 [file acp-16-1713-2016-supplement.zip › acp-16-1713-2016-supplement-title-page.pdf]

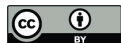

*Supplement of*

**Continuous measurements at the urban roadside in an Asian megacity by Aerosol Chemical Speciation Monitor (ACSM): particulate matter characteristics during fall and winter seasons in Hong Kong**

**C. Sun et al.**

*Correspondence to:* C. K. Chan (chak.k.chan@cityu.edu.hk)

- [acp-16-1713-2016-supplement-title-page.pdf](#)
- [supplementMK\\_20160124\\_Grace\\_revised.docx](#)

The copyright of individual parts of the supplement might differ from the CC-BY 3.0 licence.
