# Supplementary material for: Continuous measurements at the urban roadside in an Asian megacity by Aerosol Chemical Speciation Monitor (ACSM): particulate matter characteristics during fall and winter seasons in Hong Kong
Source: Copernicus journal article supplement (doi:10.5194/acp-16-1713-2016), 2016-02-15
Supplement: Supplementary file 1 [file acp-16-1713-2016-supplement.zip › supplementMK_20160124_Grace_revised.docx]

Continuous measurements at the urban roadside in an Asian Megacity by Aerosol Chemical Speciation Monitor (ACSM): Particulate matter characteristics during fall and winter seasons in Hong Kong

Chengzhu Sun1, Berto P. Lee1, Dandan Huang2,Yong Jie Li3, Misha I. Schurman1, Peter K. K. Louie4, Connie Luk4 and Chak K. Chan1,2,5*

1 Division of Environment, Hong Kong University of Science and Technology, Kowloon, Hong Kong, China

2 Department of Chemical and Biomolecular Engineering, Hong Kong University of Science and Technology, Kowloon, Hong Kong, China

3 Faculty of Science and Technology, University of Macau, Taipa, Macau, China

4 Hong Kong Environmental Protection Department, Wan Chai, Hong Kong, China

5 School of Energy and Environment, City University of Hong Kong, Hong Kong, China

*Corresponding author: [chak.k.chan@cityu.edu.hk](mailto:chak.k.chan@cityu.edu.hk)

**Supporting Material**

1. **Sampling set-up**

Ambient air was sampled through a PM2.5 cyclone on the rooftop (approximately 3m above ground level) of an air conditioned sampling shelter at a flow rate of 3.1 L/min, with 0.1 L/min drawn by the ACSM. The sampled air passed through a Nafion dryer (PD-200T-12MSS, Perma Pure LLC) before going into the ACSM. Ionization efficiency (IE) calibrations were performed at least once per month during the first three months with DMA-size-selected (Dm=350nm) pure ammonium nitrate particles (Jayne et al., 2000; Lee et al., 2015). A HEPA filter was installed in-line before the ACSM for one- to three hours (filter time) per month to determine the detection limits (DL) of the ACSM, which are defined as three times the standard deviations of the concentrations of all species during the filter period. Data points falling below their corresponding detection limit were set to zero in our analysis (Table S1). All mass concentrations were determined at ambient temperature and pressure and presented in local time.

1. **Data Treatment**

The ammonium RIE of 4.57 and sulfate RIE of 1.2 were determinate based on the average value from five IE calibrations, while the default RIE values of 1.1 for nitrate, 1.3 for chloride and 1.4 for organics were used (Allan et al., 2003; Jimenez et al., 2003).The influence of RH in this study is considered minor as a Nafion dryer was used to keep the sampling line RH consistently below 30%. Middlebrook et al. (2012) developed an equation based to aerosol composition to estimate the collection efficiency (CE). Under the dry conditions used in our sampling, the Middlebrook parameterization suggests a CE of ~45-50% based on the measured inorganic constituents (Middlebrook et al., 2012). However, the NR-PM1 concentration of majority data points (~83%), if calculated with a CE of 0.45, would exceed the PM2.5 concentration measured by TEOM which indicates an under-value of CE. Therefore, the Middlebrook result is not applicable to this study because dominance of organic compounds (58.2% of NR-PM1) at the measurement site could hinder the complete efflorescence of particles in the drier and reduce the particle bounce effect, increase the particle collection efficiency.

A CE of 0.8 was chosen based on the comparison of the NR-PM1 measurements and PM2.5 measured independently by HKEPD. The average ratio of NR-PM1 to PM2.5 (0.59; Figure S1) is consistent with the results in previous studies that NR-PM1 contributes 56%-64% of PM2.5 assuming that NR-PM1 approximately equals the difference between PM2.5 and elemental carbon (EC) in PM2.5 (Cheng et al., 2006; Lee et al., 2006). We also did a brief comparison of HR-ToF-AMS and ACSM measurements between August 25 and August 29, with all measured NR-PM1 species correlating well with a Pearson's R values of more than 0.9. The average ratio of SO4, NO3, NH4 and organics of ACSM to that of AMS are 0.90, 0.88, 0.78 and 1.01 respectively (Fig. S2). The mass of chloride measured by AMS is much lower than that of ACSM. However, as the concentration of chloride during the sampling period was very low in general, we did not discuss chloride trends in this paper.

1. **PMF analysis on Organic Spectra**

In this study, PMF input mass spectra were limited to a maximum m/z of 110 because the signal uncertainty at higher m/z values was large due to low ion transmission efficiency and significant interferences from the internal standard of naphthalene at m/z 127-129 (Ng et al., 2011; Sun et al., 2013). PMF was run in “exploration” mode with fpeak changing from -1 to 1 in steps of 0.2 and the P value (the number of factor) from 1 to 6. PMF analysis procedures followed those in Zhang et al. (2005, 2011).

A 4-factor solution is thought to be optimal. First, a 3-factor solution resolves hydrocarbon-like OA (HOA) incorrectly (Figure S3) with excess m/z 44 fractional intensity (f44=5%) and a rather poor correlation with NOx, with a Pearson’s R value (Rpr) of 0.43 (Table S2). Second, a 5-factor solution resolves one unknown factor (Factor 1) which shows very similar variations in time series as Factor 4 (Rpr=0.80; Figure S4). Lastly, the 6-factor solution not only yields two HOA factors with similar diurnal pattern and mass spectra, but also resolves two OOA-related factors (Factor 2 and 4) with nearly same mass spectra (Ruc =0.97), both showing extremely high f44 (Fig. S5). The 4-factor solution yields Q/Qexp=0.8 and better differentiation among the factor time series (Rpr <0.6; Figure S6). The four factors also correlate well with associated inorganics and external tracers (NO3, SO4, NH4, NOx; Zhang et al., 2005a, 2011; Ulbrich et al., 2009), e.g. HOA with NOx, SV-OOA with NO3, LV-OOA with SO4and NH4 (Table S4). Furthermore, the mass spectra of the four factors are similar (all un-centered R (Ruc) >0.80) to corresponding reference mass spectra from the AMS MS database (Ulbrich, I. M., Lechner, M., and Jimenez, J. L., AMS Spectral Database, url: <http://cires.colorado.edu/jimenez-group/AMSsd>; Ulbrich et al., 2009), as shown in next section. With the 4-factor solution, the variation of fpeak had little impact on the value of Q/Qexp, while HOA and low-volatile OOA at fpeak=0 showed the highest correlations with both NOx and SO4, when compared with solutions using other rotational values (Table S5). Therefore, a 4-factor solution with fpeak=0 was chosen.

1. **SV-OOA vs BBOA**

In the 4-factor solution, the mass spectra of resolved SV-OOA contain significant fractions of m/z 60 and m/z 73, which are important makers of BBOA mass spectra (Aiken et al., 2009; Cubision et al., 2011; Huang et al., 2011). The resolved SV-OOA spectrum in our study correlates well with both standard SV-OOA and standard BBOA spectra with Rpr of 0.87 and 0.94, respectively (Fig. S8). To assess whether a distinct BBOA factor could be resolved, we increased the number of PMF factors from 4 to 6. With a 5-factor solution, the existing SV-OOA factor was split into factor 1 and factor 4 as shown in figure 5. However, the mass spectrum of factor 1 is very different from that of BBOA, and the time series of factors 1 and 4 show a high correlation with Rpr of 0.8, indicating a common source rather than two different components. For the 6-factor solution, the existing SV-OOA factor was split into factor 1 and factor 4,and the HOA factor was divided into factor 3 and factor 6 (Fig. S5). The mass spectra of factor 1 and factor 4 are very different from that of standard BBOA with a Ruc of 0.56 and 0.68, respectively. Thus, we are not able to separate a distinct BBOA factor from the existing SV-OOA based on the unit mass resolution data, which is consistent with previous studies conducted in Hong Kong (Li et al., 2013, 2015; Lee et al., 2013, 2015).

1. **SV-OOA vs COA**

Apart from SV-OOA, m/z 60 and m/z 73 are also present in the mass spectrum of COA. Considering their similar diurnal pattern with COA (Fig. S9), the existence of these ions in the COA mass spectra should be not due to the inadequate factor separation of PMF To further examine the possibility that PMF erroneously assigned these two ions to COA instead of SV-OOA, PMF was run using only nighttime data (between 0:00 and 6:00), when there is only residual COA present (Figure S10). We found that these two ions still persist, with similar fractional intensities in SV-OOA as at other times and have thus been correctly assigned.

On the other hand, the diurnal pattern of SV-OOA also shows matching peaks with COA. To further examine the relationship of the COA factor and SV-OOA factor, PMF was run with 4, 5 and 6 factor solutions respectively. The correlations between COA and SV-OOA like factors decrease (Table S6) as the number of PMF factor increases. However, the mass spectral correlations (Ruc) between resolved COA and standard COA decrease from 0.84 to 0.77, and the correlation of the sum of SV-OOA like factors and standard SV-OOA reduces from 0.87 to 0.79, indicating a reduction of the quality of PMF solution. In addition, the average COA loading decreases from 3.6 to 2.7 µg/m3 rather than increase, which suggests that increasing the number of PMF factors does not separate possible COA related components from the SV-OOA like factors.

The effects of varying fpeak on the correlations between SV-OOA and the COA time series from this 4-factor solution were also analyzed. As shown in Tables S7 and S8, when the fpeak value changes from 0 to -0.2 and -0.4, the time series correlation of SV-OOA and COA just decreases slightly, but the mass spectra correlations between resolved COA, SV-OOA and their standards decrease appreciably. When the fpeak value increases from 0 to 0.4, the similarity of COA and SV-OOA times series increase dramatically, and except for LV-OOA the mass spectra correlations between resolved OA factor and their standard profiles all decrease. We acknowledge the limitation and uncertainty of PMF analysis on resolving factors, but considering the resulting mass spectra, the time series data of the loadings and the correlations with standard mass spectra, we consider that the four-factor solution with an fpeak value of 0 is optimal in our case.

1. **The source of m/z 60 and 73**

The fractions of signal at m/z 60 and m/z 73 to the total signal of SV-OOA like factors are persistent and remain above 1% as the number of PMF factor increases from 4 to 6 as shown in table S6. In terms of the source of these two ions, the similar diurnal pattern and well matched peaks in the time series data between m/z 60, m/z 73 and COA indicate that cooking emissions contribute part of m/z 60 and m/z 73 (Fig. S9). Furthermore, LV-OOA tracks very well with the baseline of m/z 60 and m/z 73 as shown in Fig. S11, illustrating the partial of contribution of long-range transport to m/z 60 and m/z 73. The sum of LV-OOA and COA show a better correlation with m/z 60 (Rpr=0.72) and m/z 73 (Rpr=0.78) than each single factor as shown in Table S9, supporting above hypothesis that transport aerosol and local cooking emissions are both sources of m/z 60 and 73 at Mong Kok. In addition, the comparison between m/z 60, 73 and plumes of EC and CO do not correlate well with NOx represented by EC_resiudal and CO_residual (Fig. S12). M/z 60 showed weak correlation with the residual of EC (Rpr=0.37) and CO (Rpr=0.21). A similar weak relation is apparent for m/z 73. Therefore, biomass burning influence around the Mong Kok site is highly unlikely. Also, the ratio of the signal at m/z 60 to the total signal in the OA mass spectrum (0.48%) in this study is just slightly higher than the baseline level (0.3%±0.06%) observed in environments without biomass burning influence and SOA dominance in ambient OA (Cubision et al.,2011). Based on the above analysis, we conclude that m/z 60 and 73, usually marker fragments of BBOA, were mainly imbedded in cooking emissions and transport aerosol rather than a distinct source.

**Tables**

**Table S1.** Summary for monthly detection limits of NR-PM1 species (SO4, NO3, NH4, Chl and Org)

| **Species µg/m3** | **September** | **October** | **November** | **December** |
| --- | --- | --- | --- | --- |
| **SO4** | 0.22 | 0.04 | 0.05 | 0.07 |
| **NO3** | 0.04 | 0.01 | 0.02 | 0.05 |
| **NH4** | 0.07 | 0.06 | 0.12 | 0.11 |
| **Chl** | 0.02 | 0.03 | 0.02 | 0.02 |
| **Org** | 0.69 | 0.17 | 0.28 | 0.34 |

**Table S2.** Correlation coefficients (Rpr) between resolved factors and SO4, NO3, NH4 and NOx under solution of 3 factors with fPeak=0.

| **Pearson R** | **SO4** | **NO3** | **NH4** | **NOx** |
| --- | --- | --- | --- | --- |
| **Factor1** | 0.80 | 0.66 | 0.85 | 0.25 |
| **Factor2** | 0.07 | 0.13 | 0.08 | 0.55 |
| **Factor3** | 0.40 | 0.67 | 0.57 | 0.43 |

**Table S3.** Correlation coefficients (Rpr) between resolved factors and SO4, NO3, NH4 and NOx under solution of 5 factors with fPeak=0.

| **Pearson R** | **SO4** | **NO3** | **NH4** | **NOx** |
| --- | --- | --- | --- | --- |
| **Factor1** | 0.28 | 0.48 | 0.38 | 0.31 |
| **Factor2** | 0.85 | 0.57 | 0.86 | 0.25 |
| **Factor3** | -0.01 | 0.13 | 0.04 | 0.48 |
| **Factor4** | 0.54 | 0.71 | 0.70 | 0.30 |
| **Factor5** | **0.16** | **0.33** | **0.25** | **0.68** |

**Table S4.** Correlation coefficients (Rpr) between resolved factors and SO4, NO3, NH4 and NOx under solution of 4 factors with fPeak=0.

| **Pearson R** | **SO4** | **NO3** | **NH4** | **NOx** |
| --- | --- | --- | --- | --- |
| **LV-OOA** | 0.86 | 0.63 | 0.88 | 0.21 |
| **SV-OOA** | 0.39 | 0.63 | 0.55 | 0.39 |
| **COA** | 0.05 | 0.11 | 0.06 | 0.42 |
| **HOA** | 0.25 | 0.48 | 0.38 | 0.70 |

**Table S5.** Correlation coefficients between resolved factors and associated tracer (SO4, NO3 and NOx) on time series, and corresponding standard mass spectra under 4-factor solution.

| **fPeak** | **-0.4** | **-0.2** | **0** | **+0.2** | **+0.4** |
| --- | --- | --- | --- | --- | --- |
| **Correlation with associated tracer (Rpr)** | | | | | |
| **HOA & NOx** | 0.64 | 0.65 | 0.70 | 0.63 | 0.63 |
| **LV-OOA & SO4** | 0.82 | 0.85 | 0.86 | 0.84 | 0.80 |
| **SV-OOA & NO3** | 0.64 | 0.63 | 0.63 | 0.64 | 0.64 |
| **Correlation with standard mass spectra (Ruc)** | | | | | |
| **HOA** | 0.94 | 0.94 | 0.92 | 0.90 | 0.88 |
| **COA** | 0.77 | 0.77 | 0.84 | 0.76 | 0.75 |
| **LV-OOA** | 0.98 | 0.98 | 0.97 | 0.97 | 0.97 |
| **SV-OOA** | 0.83 | 0.85 | 0.87 | 0.78 | 0.84 |

**Table S6.** Correlation of resolved OA factor mass spectra and their standard profiles, time series correlation between COA and SV-OOA like factors, fractional signal at m/z 60, 73 to total SV-OOA signal, and the average mass concentration of OA factors for the 4-factor, 5-factor and 6-factor solutions.

|  | Organic factors | 4 factor | 5 factor | 6 factor |
| --- | --- | --- | --- | --- |
| **Ruc for mass spectra** | COA with standard | 0.84 | 0.76 | 0.77 |
| SV-OOA with standard | 0.87 | 0.85 | 0.79 |
| HOA with standard | 0.93 | 0.93 | 0.98 |
| LV-OOA with standard | 0.97 | 0.97 | 0.97 |
| **Rpr for Time series** | COA with SV-OOA like factor 1 | 0.45 | 0.36 | 0.26 |
| COA with SV-OOA like factor 2 |  | 0.39 | 0.22 |
| COA with SV-OOA like factor 1+ factor 2 |  | 0.37 | 0.28 |
| **Fraction in SV-OOA** | m/z 60 | 1.4% | 1.3% | 1% |
| m/z 73 | 1.6% | 1.5% | 1.1% |
| **Concentration**  **(µg/m3)** | Average COA | 3.6 | 2.6 | 2.7 |
| Average SV-OOA | 3.1 | 4.4 | 5.0 |
| Average HOA | 2.7 | 2.5 | 2.3 |
| Average LV-OOA | 5.7 | 5.2 | 5.0 |

**Table S7.** Time series correlation between resolved SV-OOA and COA for the 4-factor solution for different fpeak values.

| Rpr | -0.4 | -0.2 | 0 | 0.2 | 0.4 |
| --- | --- | --- | --- | --- | --- |
| SV-OOA and COA | 0.40 | 0.43 | 0.45 | 0.64 | 0.63 |

**Table S8.** Correlation between our resolved PMF factors from the 4-factor solution with standard mass spectra (STD) for different fpeak values.

| **Ruc\fpeak** | -0.4 | -0.2 | 0 | 0.2 | 0.4 |
| --- | --- | --- | --- | --- | --- |
| **HOA vs STD** | 0.94 | 0.94 | 0.92 | 0.90 | 0.88 |
| **COA vs STD** | 0.77 | 0.77 | 0.84 | 0.76 | 0.75 |
| **LV-OOA vs STD** | 0.98 | 0.98 | 0.97 | 0.97 | 0.97 |
| **SV-OOA vs STD** | 0.83 | 0.85 | 0.87 | 0.78 | 0.84 |

**Table S9.** Correlations of the time series data between m/z 60, 73 and SV-OOA, LV-OOA, COA, sum of LV-OOA and COA, NO3, NH4 and SO4.

| **Pearson R** | SV-OOA | LV-OOA | COA | LV-OOA+COA | NO3 | NH4 | SO4 |
| --- | --- | --- | --- | --- | --- | --- | --- |
| **m/z60** | 0.92 | 0.55 | 0.49 | 0.72 | 0.66 | 0.59 | 0.42 |
| **m/z73** | 0.93 | 0.54 | 0.58 | 0.78 | 0.64 | 0.57 | 0.41 |

**Table S10.** Correlation coefficients (Rpr) between HOA concentration and NOx, CO and VOCs (n-Pentane, i-Pentane, Toluene, Benzene).

| **Gas/VOCs** | **Rpr with HOA** | |
| --- | --- | --- |
| **NOx**  **CO n-Pentane**  **i-Pentane Toluene**  **Benzene** | | 0.69  0.62 0.61  0.57  0.55  0.56 |

**Figures**

**Figure S1.** (y) NR-PM1 concentration measured by ACSM versus (x) PM2.5 measured by TEOM during the entire study period.

**SO4**

**Rpr = 0.99**

**NO3**

**Rpr = 0.95**

**Chl**

**Rpr= 0.92**

**NH4**

**Rpr = 0.95**

**Org**

**Rpr = 0.98**

**Figure S2**. The concentration comparison of HR-ToF-AMS and ACSM measurements between August 25 and August 29, all the concentration were calculated by default RIE values.

**Figure S3**. The mass spectra, time series and diurnal pattern for 3 factors with fPeak=0

**(b)**

**(a)**

**(c)**

**Figure S4**. **(a)** The mass spectra, time series, and diurnal pattern for 5 factors with fPeak=0, **(b)** correlation between mass spectra profile or time series profiles of each two factors, and **(c**) Q/Qexp variation as a function of number of factors.

**Figure S5.** The mass spectra, time series, and diurnal pattern for 6 factors with fPeak= -0.2, **(b)** correlation between mass spectra profile or time series profiles of each two factors, and **(c**) Q/Qexp variation as a function of number of factors.

**Figure S6. (a)** The mass spectra, time series and diurnal pattern for 4 factors with fPeak=0, **(b)** correlation between mass spectra profile or time series profiles of each two factors, and **(c)** Q/Qexp variation as a function of number of factors.

**Figure S7**. PMF diagnostics for 4 factors with fPeak=0.

**Figure S8.** Mass spectra of resolved SV-OOA (pink) in our study and standard mass spectra of BBOA available on the AMS MS database (Ulbrich, I. M., Lechner, M., and Jimenez, J. L., AMS Spectral Database)

**Figure S9.** Diurnal pattern of m/z 60, m/z 73 and COA concentration.

**Figure S10**. The mass spectra and time series resolved by PMF based on data with little COA (0:00 -6:00).


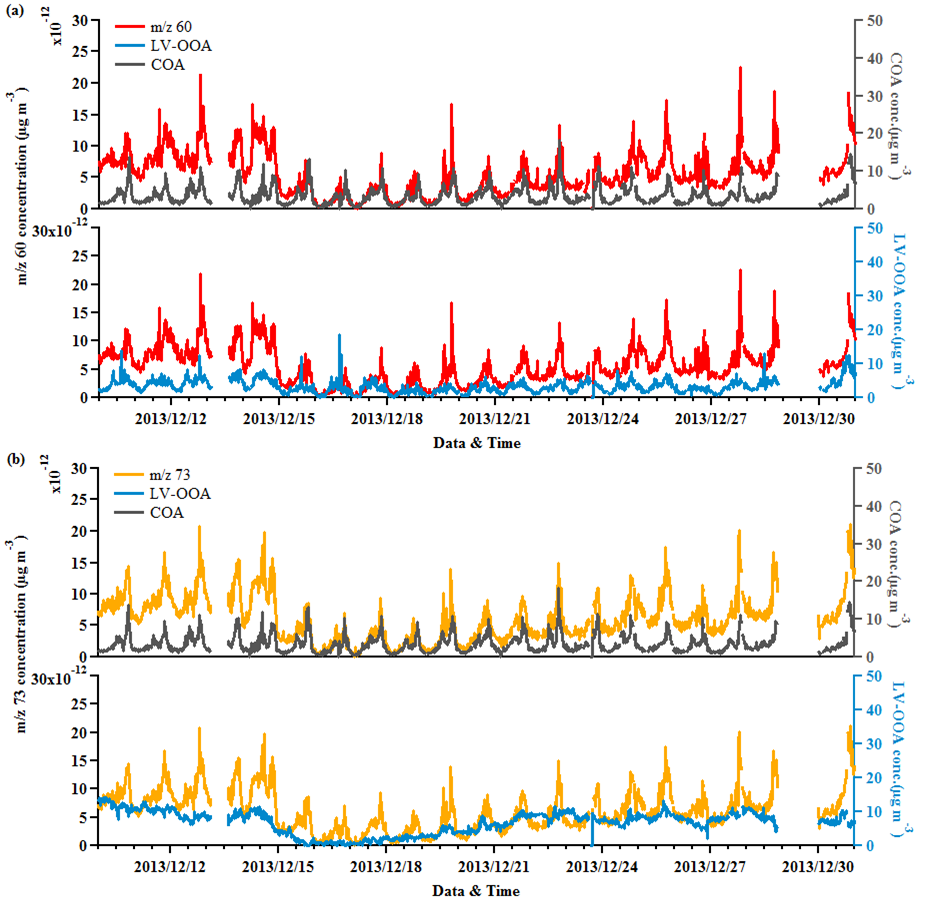


**Figure S11.** Temporal variation of m/z 60, m/z 73, LV-OOA and COA, excerpt from December, 2013.


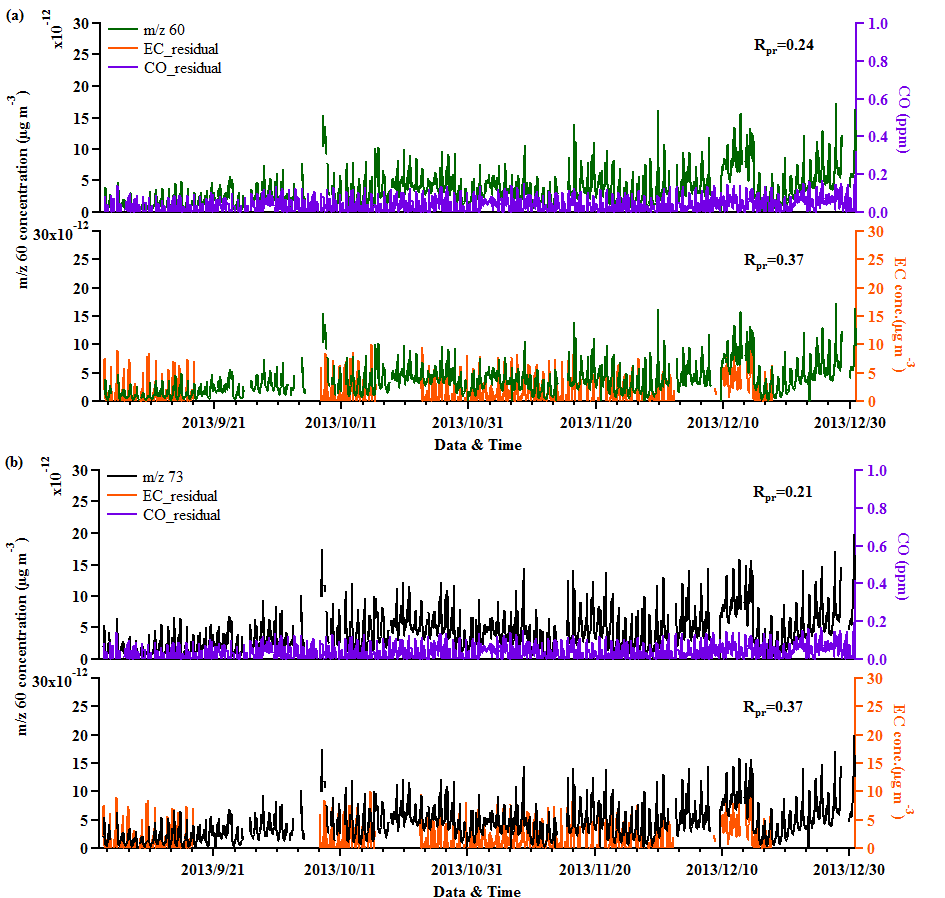


**Figure S12.** Time series of m/z 60, m/z 73, EC_residual and CO_residual. Note that EC_residual and CO_residual are defined as the residual of the equation: EC (or CO) =a* NOx.

**Figure S13.**Variation of average concentration of SV-OOA binned by LV-OOA concentration with a step of 2 µg/m3 as a function of binned LV-OOA concentration.

**Figure S14.** Overview of temporal variation of **(a)** meteorological factors (Relative humidity, Temperature and Precipitation) and **(b)** non-refractory PM1 species (Org, SO4, NO3, NH4 and Chl) and organic aerosol components (LVOOA, SVOOA, HOA and COA) during haze period 1 (H1) and haze period 2 (H2).

References

Allan, J. D., Jimenez, J. L., Williams, P. I., Alfarra, M. R., Bower, K. N., Jayne, J. T., Coe, H. and Worsnop, D. R.: Quantitative sampling using an Aerodyne aerosol mass spectrometer 1. Techniques of data interpretation and error analysis, J. Geophys. Res., 108, 4090, doi: 10.1029/2002jd002358, 2003.

Cheng, Y., Ho, K. F., Lee, S. C. and Law, S. W.: Seasonal and diurnal variations of PM1.0, PM2.5 and PM10 in the roadside environment of hong kong, China Particuology, 4, 312-315, doi: 10.1016/s1672-2515(07)60281-4, 2006.

DeCarlo, P. F., Ulbrich, I. M., Crounse, J., de Foy, B., Dunlea, E. J., Aiken, A. C., Knapp, D., Weinheimer, A. J., Campos, T., Wennberg, P. O. and Jimenez, J. L.: Investigation of the sources and processing of organic aerosol over the Central Mexican Plateau from aircraft measurements during MILAGRO, Atmos. Chem. Phys., 10, 5257-5280, doi:10.5194/acp-10-5257-2010, 2010.

He, L. Y., Lin, Y., Huang, X. F., Guo, S., Xue, L., Su, Q., Hu, M., Luan, S. J. and Zhang, Y. H.: Characterization of high-resolution aerosol mass spectra of primary organic aerosol emissions from Chinese cooking and biomass burning. Atmos. Chem. Phys., 10, 11535-11543, doi: 10.5194/acp-10-11535-2010, 2010.

Jayne, J. T., Leard, D. C., Zhang, X., Davidovits, P., Smith, K, A., Kolb, C. E. and Worsnop, D. R.: Development of an Aerosol Mass Spectrometer for Size and Composition Analysis of Submicron Particles, Aerosol Sci. Technol., 33, 49-70, doi: 10.1080/027868200410840, 2000.

Jimenez, J. L., Jayne, J. T., Shi, Q., Kolb, C. E., Worsnop, D. R., Yourshaw, I., Seinfeld, J. H., Flagan, R. C., Zhang, X. F., Smith, K. A., Morris, J. W. and Davidovits, P.: Ambient aerosol sampling using the Aerodyne Aerosol Mass Spectrometer, J. Geophys. Res., 108, 8425, doi: 10.1029/2001jd001213, 2003.

Lanz, V. A., Alfarra, M. R., Baltensperger, U., Buchmann, B., Hueglin, C. and Prévôt, A. S. H.: Source apportionment of submicron organic aerosols at an urban site by factor analytical modelling of aerosol mass spectra, Atmos. Chem. Phys., 7, 1503-1522, doi: 10.5194/acp-7-1503-2007, 2007.

Lee, B. P., Li, Y. J., Yu, J. Z., Louie, P. K. K. and Chan, C. K.: Physical and chemical characterization of ambient aerosol by HR-ToF-AMS at a suburban site in Hong Kong during springtime 2011. J. Geophys. Res., 118, 8625-8639, doi: 10.1002/jgrd.50658, 2013.

Lee, B. P., Li, Y. J., Yu, J. Z., Louie, P. K. K. and Chan, C. K.: Characteristics of submicron particulate matter at the urban roadside in downtown Hong Kong – overview of 4 months of continuous high-resolution aerosol mass spectrometer (HR-AMS) measurements, J. Geophys. Res., 120, 7040-7058, doi: 10.1002/2015JD023311, 2015.

Li, Y. J., Lee, B. Y. L., Yu, J. Z., Ng, N. L. and Chan, C. K.: Evaluating the degree of oxygenation of organic aerosol during foggy and hazy days in Hong Kong using high-resolution time-of-flight aerosol mass spectrometry (HR-ToF-AMS), Atmos. Chem. Phys., 13, 8739-8753, doi: 10.5194/acp-13-8739-2013, 2013.

Li, Y. J., Lee, B. P., Su, L., Fung, J. C. H. and Chan, C. K.: Seasonal characteristics of fine particulate matter (PM) based on high-resolution time-of-flight aerosol mass spectrometric (HR-ToF-AMS) measurements at the HKUST Supersite in Hong Kong, Atmos. Chem. Phys., 15, 37-53, doi: 10.5194/acp-15-37-2015, 2015.

Middlebrook, A. M., Bahreini, R., Jimenez, J. L. and Canagaratna, M. R.: Evaluation of Composition-Dependent Collection Efficiencies for the Aerodyne Aerosol Mass Spectrometer using Field Data, Aerosol Sci. Technol., 46, 258-271, doi: 10.1080/02786826.2011.620041, 2012.

Ng, N. L., Herndon, S. C., Trimborn, A., Canagaratna, M. R., Croteau, P. L., Onasch, T. B., Sueper, D., Worsnop, D. R., Zhang, Q., Sun, Y. L. and Jayne, J. T.: An Aerosol Chemical Speciation Monitor (ACSM) for Routine Monitoring of the Composition and Mass Concentrations of Ambient Aerosol, Aerosol Sci. Technol., 45, 780-794, doi: 10.1080/02786826.2011.560211, 2011.

Sun, Y. L., Wang, Z. F., Fu, P. Q., Jiang, Q., Yang, T., Li, J. and Ge, X.: The impact of relative humidity on aerosol composition and evolution processes during wintertime in Beijing, China, Atmos. Environ., 77, 927-934, doi: 10.1016/j.atmosenv.2013.06.019, 2013.

Tiitta, P., Vakkari, V., Croteau, P., Beukes, J. P., van Zyl, P. G., Josipovic, M., Venter, A. D., Jaars, K., Pienaar, J. J., Ng, N. L., Canagaratna, M. R., Jayne, J. T., Kerminen, V. M, Kokkola, H., Kulmala, M., Laaksonen, A., Worsnop, D. R. and Laakso, L.: Chemical composition, main sources and temporal variability of PM1 aerosols in southern African grassland, Atmos. Chem. Phys., 14, 1909—1927, doi: 10.5194/acp-14-1909-2014, 2014.

Ulbrich, I. M., Canagaratna, M. R., Zhang, Q., Worsnop, D. R. and Jimenez, J. L.: Interpretation of organic components from Positive Matrix Factorization of aerosol mass spectrometric data, Atmos. Chem. Phys., 9, 2891-2918, doi: 10.5194/acp-9-2891-2009, 2009.

Zhang, Q., Alfarra, M. R., Worsnop, D. R., Allan, J. D., Coe, H., Canagaratna, M. R. and Jimenez, J. L.: Deconvolution and Quantification of Hydrocarbon-like and Oxygenated Organic Aerosols Based on Aerosol Mass Spectrometry, Environ. Sci. Technol., 39, 4938-4952, doi: 10.1021/es048568l, 2005.

Zhang, Q., Jimenez, J. L., Canagaratna, M. R., Ulbrich, I. M., Ng, N. L., Worsnop, D. R. and Sun, Y.: Understanding atmospheric organic aerosols via factor analysis of aerosol mass spectrometry: a review, Analyt. Bioanalyt. Chem., 401, 3045-3067, doi: 10.1007/s00216-011-5355-y, 2011.
